# Supplementary material for: Fluorescence in situ hybridization (FISH) to predict the efficacy of Bacillus Calmette-Guérin perfusion in bladder cancer
Source: PubMed Central journal article supplement — Transl Cancer Res. 2022 Oct;11(10):3448–57. doi: 10.21037/tcr-22-1367 (PMC9641077; doi:10.21037/tcr-22-1367), 2022-10
Supplement: tcr-11-10-3448-supplementary.pdf [file tcr-11-10-3448-supplementary.pdf]

**Table S1** A summary of several studies on the predictive effect of FISH on recurrence of bladder cancer at different time nodes before and after BCG perfusion

| Study                        | Pre-BCG           |         |                     | Post-BCG, 6 weeks |         |                     | Post-BCG, 3 months |         |                      | Post-BCG, 6 months |       |                        |
|------------------------------|-------------------|---------|---------------------|-------------------|---------|---------------------|--------------------|---------|----------------------|--------------------|-------|------------------------|
|                              | (t <sub>0</sub> ) |         | HR<br>(95% CI)      | (t <sub>1</sub> ) |         | HR<br>(95% CI)      | (t <sub>2</sub> )  |         | HR<br>(95% CI)       | (t <sub>3</sub> )  |       | HR<br>(95% CI)         |
|                              | FISH-             | FISH+   |                     | FISH-             | FISH+   |                     | FISH-              | FISH+   |                      | FISH-              | FISH+ |                        |
|                              | Rec/Pts           | Rec/Pts | Rec/Pts             | Rec/Pts           | Rec/Pts | Rec/Pts             | Rec/Pts            | Rec/Pts | Rec/Pts              | Rec/Pts            |       |                        |
| Mengual<br><i>et al.</i> (1) | 5/10              | 19/55   | 0.67<br>(0.25–1.79) |                   |         |                     | 9/36               | 15/29   | 3.23<br>(1.29–8.04)  |                    |       |                        |
| Savic<br><i>et al.</i> (2)   | 4/20              | 14/30   | 1.88<br>(0.60–5.87) |                   |         |                     | 10/48              | 12/20   | 2.54<br>(1.05–6.17)  |                    |       |                        |
| Kamat<br><i>et al.</i> (3)   | 9/39              | 39/95   | 1.93<br>(0.93–3.99) | 16/72             | 33/64   | 2.88<br>(1.58–5.24) | 9/54               | 31/49   | 4.56<br>(2.14–9.71)  | 4/49               | 15/22 | 23.44<br>(5.26–104.49) |
| Liem<br><i>et al.</i> (4)    | 25/73             | 18/52   | 0.95<br>(0.52–1.75) | 28/96             | 7/17    | 1.36<br>(0.59–3.12) | 7/48               | 10/19   | 5.76<br>(1.61–20.64) |                    |       |                        |
| Total (5)                    | 43/142            | 90/232  | 1.20<br>(0.81–1.79) | 44/168            | 40/81   | 2.23<br>(1.37–3.62) | 35/186             | 68/117  | 3.70<br>(2.34–5.83)  | 4/49               | 15/22 | 23.44<br>(5.26–104.49) |

Note: Rec, recurrence; Pts, patients; FISH, Fluorescence in situ hybridization; BCG, Bacillus Calmette-Guérin; HR, Hazard ratio; 95% CI, 95% confidence interval.

## References

- Mengual L, Marin-Aguilera M, Ribal MJ, et al. Clinical utility of fluorescent in situ hybridization for the surveillance of bladder cancer patients treated with bacillus Calmette-Guerin therapy. *Eur Urol.* 2007;52(3):752-759.
- Savic S, Zlobec I, Thalmann GN, et al. The prognostic value of cytology and fluorescence in situ hybridization in the follow-up of nonmuscle-invasive bladder cancer after intravesical Bacillus Calmette-Guerin therapy. *Int J Cancer.* 2009;124(12):2899-2904
- Kamat AM, Dickstein RJ, Messetti F, et al. Use of fluorescence in situ hybridization to predict response to bacillus Calmette-Guerin therapy for bladder cancer: results of a prospective trial. *J Urol.* 2012;187(3):862-867.
- Liem E, Baard J, Cauberg EC, et al. Fluorescence in situ hybridization as prognostic predictor of tumor recurrence during treatment with Bacillus Calmette-Guerin therapy for intermediate- and high-risk non-muscle-invasive bladder cancer. *Med Oncol.* 2017;34(10):172.
- Liem E, Oddens JR, Vernooij RWM, et al. The Role of Fluorescence In Situ Hybridization for Predicting Recurrence after Adjuvant bacillus Calmette-Guerin in Patients with Intermediate and High Risk Nonmuscle Invasive Bladder Cancer: A Systematic Review and Meta-Analysis of Individual Patient Data. *J Urol.* 2020;203(2):283-291.
